# Supplementary material for: Delayed first active-phase meal, a breakfast-skipping model, led to increased body weight and shifted the circadian oscillation of the hepatic clock and lipid metabolism-related genes in rats fed a high-fat diet
Source: PubMed Central journal article supplement (PMC6209334; doi:10.1371/journal.pone.0206669), 2018-10-31
Supplement: pone.0206669.s001.pdf [file pone.0206669.s001.pdf]

**Supplementary Table 1.** Primer sequences for quantitative real-time PCR.

| <b>Gene</b>      | <b>Accession No.</b> | <b>Forward primer ( 5'→3' )</b> | <b>Reverse Primer ( 5'→3' )</b> |
|------------------|----------------------|---------------------------------|---------------------------------|
| ABCG5            | NM_053754.2          | TGTCCTTCAGCGTCAGCAAC            | TCTGGCCACTCTCGATGTAC            |
| ACLY             | NM_016987.2          | TGGACTTTGACTACGTGTGC            | AAGACAGGGATCAGGATTTTC           |
| ACOX1            | NM_017340.2          | TGATGAAATACGCCCAGGTG            | CCCATACGTCAGCTTGTTAC            |
| APOE             | NM_001270681.1       | TGAACCGCTTCTGGGATTAC            | TGGGTGACTTGGGAGCTCTG            |
| BMAL1            | NM_024362.2          | TTTGTAGATCAGAGGGCGAC            | GTACCTAGAAGTTCCTGTGG            |
| CLOCK            | NM_021856.2          | AGTTAGGGCTGAAAGACGGC            | TTCCAGTGCTTCCTTGAGAC            |
| CPT1 $\alpha$    | NM_031559.2          | GGGATTAAGGTTCTGCTATG            | AAGATGTGTGAGGAAGGTGG            |
| CRY1             | NM_198750.2          | CACTATGCTCACGGAGACAG            | CCCATGGAGCTTCTTCTTTG            |
| CRY2             | NM_133405.2          | CTGGATAAGCACTTGAACG             | ACAGGCGGTAGTAGAAGAGG            |
| CYP7A1           | NM_012942.2          | TGTGTGAGGGACCAGGTCTCT           | AGCTCCAAAAGGTTGGAGGA            |
| DBP              | NM_012543.3          | CTCTAGGGACACACCCAGTCTCT         | AGGCTTCAATTCCTCCTCTGAGA         |
| DEC1             | NM_053328.1          | GAAACCATTGGACTCAGCTC            | TTTCCCAGGGCCTTCTGATC            |
| DEC2             | XM_002729454.6       | TAACAGCCTTAACGGAGCAG            | CAAGACTTCTTTGGCGCAGG            |
| E4BP4            | NM_053727.2          | ACTGGCATCACAAAGAAGTCTG          | ACTGGCATCACAAAGAAGTCTG          |
| FAS              | NM_017332.1          | CCAAGCAGGCACACACAATG            | GATACCTCCGTCGACAATAG            |
| G6PC             | NM_013098.2          | TCCGGTGCTTGAATGTCGTC            | TCTGGAGGCTGGCATTGTAG            |
| GCK              | NM_001270849.1       | AGAAGATCATCGGTGGGAAG            | TTAAGCAGCACAAAGTCGTAC           |
| HLF              | NM_024359.1          | CGCTTTGCCTTCTGCTCATC            | CCTGTGTAGGATGCTCTTTT            |
| HMG-CoAR         | NM_013134.2          | TGCACAGACTCCTCAGACGTG           | TTCGTCAAAACACCAGCTTCC           |
| HMG-CoAS         | NM_017268.1          | ACACACATCACTTAGCCAAC            | CCACTCCTTCATCCAAACTG            |
| LXR $\alpha$     | NM_031527.2          | TCCGAGATCTGGGATGTCCA            | TGCCATGCAAGGGTCTCTTT            |
| ME1              | NM_012600.2          | CTTGTTGCCACCCTGCATTG            | TAAGCACACTGTACAACAGC            |
| PEPCK            | NM_198780.3          | AACTGTTGGCTGGCTCTCAC            | TCTGCTCTTGGGTAATGATG            |
| PER1             | NM_001034125.1       | ACCAGCTCAAGGCTTAGGAGCT          | TGGGATTTGGAGAGACCACTTC          |
| PER2             | NM_031678.1          | CAACCTTTGTCTGCCATATGAGG         | CGTTAGAAACACAAGCTCTTCCAC        |
| PFKL             | NM_01390.4           | TGAGCATAGACAAGGGTTTC            | CCGAGTTCATGTGAGTTCC             |
| LPK              | NM_012624.3          | CTGAGCGTATCCTGAAATGC            | AAATAGGGTGTAAGTGGGTC            |
| PPAR $\alpha$    | NM_013196.1          | TTCGGCTAAAGCTGGCGTAC            | ACTGGCATTGTTCCGGTTC             |
| REV-ERB $\alpha$ | NM_001113422.1       | CCTTTGAGGTGCTGATGGTG            | ACATGACTGTCTGGTCCTTC            |
| REV-ERB $\beta$  | NM_147210.2          | TGAACTTCTCCAGTGCTTAC            | ACTTGCTCATAGGACAAACC            |
| ROR $\alpha$     | XM_008766408.2       | ACGATGACCTCAGCACCTAC            | CACATATGGGTTCCGGTTTG            |
| SREBP1c          | NM_001276708.1       | GGAGCCATGGATTGCACATT            | AGGAAGGCTTCCAGAGAGGA            |
| TAT              | NM_012668.2          | CTACGTGATTCAGACGGATG            | TCTTTCTTCTTGTACCGAG             |
| TEF              | NM_019194.2          | CCCTTGAGTATCAGCAGGTC            | CAGTGTAATGTCTCCAGAGC            |
