# Supplementary material for: Delayed first active-phase meal, a breakfast-skipping model, led to increased body weight and shifted the circadian oscillation of the hepatic clock and lipid metabolism-related genes in rats fed a high-fat diet
Source: PubMed Central journal article supplement (PMC6209334; doi:10.1371/journal.pone.0206669), 2018-10-31
Supplement: pone.0206669.s002.pdf [file pone.0206669.s002.pdf]

**Supplementary Table 2.** The amount of hepatic lipids in DFAM rats.

|              | <b>Control</b>             | <b>DFAM</b>  |
|--------------|----------------------------|--------------|
|              | <i>mg/g liver</i>          |              |
| Total lipid  | 59.24 ± 0.81 <sup>ab</sup> | 56.84 ± 0.70 |
| Triglyceride | 20.58 ± 0.49               | 18.20 ± 0.32 |
| Cholesterol  | 3.57 ± 0.05                | 3.45 ± 0.04  |
| Phospholipid | 24.24 ± 0.18               | 24.04 ± 0.18 |

<sup>a</sup> Values are means ± SEM, n=28.

<sup>b</sup> Statistical significance of difference between values were analyzed by Student's *t*-test.

All data were not significant ( $p>0.05$ ).
