# Supplementary material for: Delayed first active-phase meal, a breakfast-skipping model, led to increased body weight and shifted the circadian oscillation of the hepatic clock and lipid metabolism-related genes in rats fed a high-fat diet
Source: PubMed Central journal article supplement (PMC6209334; doi:10.1371/journal.pone.0206669), 2018-10-31
Supplement: pone.0206669.s003.pdf [file pone.0206669.s003.pdf]

**Supplementary Table 3.** The JTK\_CYCLE analysis of body temperature and circadian fluctuations in serum parameter in DFAM rats (Related to Fig 1E and Fig 2).

|                        | Control         |                |           | DFAM            |                |           |
|------------------------|-----------------|----------------|-----------|-----------------|----------------|-----------|
|                        | <i>p</i> -value | Peak time (ZT) | Amplitude | <i>p</i> -value | Peak time (ZT) | Amplitude |
| Body temperature       | 0.000           | 24             | 0.566     | 0.000           | 24             | 0.519     |
| Serum glucose          | 0.189           | 20             | 4.405     | 1.000           | 6              | 2.832     |
| Serum cholesterol      | 1.000           | 22             | 2.132     | 1.000           | 10             | 2.132     |
| Serum triglyceride     | 0.004           | 2              | 59.077    | 0.231           | 4              | 54.078    |
| Serum NEFA             | 0.000           | 4              | 0.166     | 0.001           | 8              | 0.146     |
| Serum total bile acids | 0.000           | 22             | 49.646    | 0.001           | 4              | 63.187    |
| Serum insulin          | 0.001           | 18             | 1.792     | 0.001           | 22             | 2.138     |
| Serum corticosterone   | 0.000           | 12             | 35.401    | 0.000           | 12             | 44.749    |
