# Supplementary material for: Delayed first active-phase meal, a breakfast-skipping model, led to increased body weight and shifted the circadian oscillation of the hepatic clock and lipid metabolism-related genes in rats fed a high-fat diet
Source: PubMed Central journal article supplement (PMC6209334; doi:10.1371/journal.pone.0206669), 2018-10-31
Supplement: pone.0206669.s004.pdf [file pone.0206669.s004.pdf]

**Supplementary Table 4.** The JTK\_CYCLE analysis of circadian fluctuations in hepatic clock genes in DFAM rats (related to Fig 3).

| Hepatic clock gene | Control         |                |           | DFAM            |                |           |
|--------------------|-----------------|----------------|-----------|-----------------|----------------|-----------|
|                    | <i>p</i> -value | Peak time (ZT) | Amplitude | <i>p</i> -value | Peak time (ZT) | Amplitude |
| BMAL1              | 0.000           | 0              | 49.466    | 0.000           | 2              | 45.857    |
| CLOCK              | 0.002           | 0              | 21.287    | 0.003           | 2              | 20.631    |
| PER1               | 0.001           | 14             | 19.079    | 0.000           | 16             | 15.913    |
| PER2               | 0.000           | 18             | 54.247    | 0.000           | 18             | 37.859    |
| CRY1               | 0.000           | 20             | 43.541    | 0.000           | 0              | 19.932    |
| CRY2               | 0.000           | 16             | 83.835    | 0.000           | 18             | 68.529    |
| DEC1               | 0.000           | 18             | 26.586    | 0.000           | 22             | 23.106    |
| DEC2               | 0.000           | 14             | 157.344   | 0.000           | 14             | 138.799   |
| REV-ERB $\alpha$   | 0.000           | 10             | 34.233    | 0.000           | 12             | 46.731    |
| REV-ERB $\beta$    | 0.000           | 12             | 523.961   | 0.000           | 14             | 494.034   |
| ROR $\alpha$       | 0.001           | 22             | 21.505    | 0.110           | 22             | 13.593    |
| E4BP4              | 0.000           | 0              | 26.582    | 0.000           | 0              | 36.720    |
| DBP                | 0.000           | 12             | 61.582    | 0.000           | 16             | 50.912    |
| TEF                | 0.000           | 14             | 199.577   | 0.000           | 16             | 177.168   |
| HLF                | 0.000           | 18             | 34.908    | 0.000           | 20             | 27.352    |
