# Supplementary material for: Delayed first active-phase meal, a breakfast-skipping model, led to increased body weight and shifted the circadian oscillation of the hepatic clock and lipid metabolism-related genes in rats fed a high-fat diet
Source: PubMed Central journal article supplement (PMC6209334; doi:10.1371/journal.pone.0206669), 2018-10-31
Supplement: pone.0206669.s005.pdf [file pone.0206669.s005.pdf]

**Supplementary Table 5.** The JTK\_CYCLE analysis of circadian fluctuations in hepatic lipid metabolism related genes in DFAM rats (related to Fig 4).

| Hepatic lipid metabolism related gene | Control         |                |           | DFAM            |                |           |
|---------------------------------------|-----------------|----------------|-----------|-----------------|----------------|-----------|
|                                       | <i>p</i> -value | Peak time (ZT) | Amplitude | <i>p</i> -value | Peak time (ZT) | Amplitude |
| SREBP1c                               | 0.001           | 20             | 27.552    | 0.000           | 22             | 28.380    |
| LXR $\alpha$                          | 0.000           | 22             | 19.226    | 0.006           | 0              | 10.663    |
| ACLY                                  | 0.000           | 22             | 33.628    | 0.001           | 2              | 16.157    |
| FAS                                   | 0.000           | 20             | 29.501    | 0.000           | 0              | 12.403    |
| ME1                                   | 0.000           | 2              | 33.592    | 0.005           | 6              | 27.337    |
| PPAR $\alpha$                         | 0.000           | 14             | 22.284    | 0.000           | 14             | 31.630    |
| CPT1 $\alpha$                         | 0.000           | 10             | 36.317    | 0.000           | 14             | 31.296    |
| ACOX1                                 | 0.010           | 20             | 8.902     | 0.009           | 22             | 10.702    |
| HMG-CoAR                              | 0.077           | 20             | 11.964    | 0.098           | 20             | 17.918    |
| HMG-CoAS                              | 0.000           | 0              | 28.785    | 0.000           | 6              | 33.167    |
| CYP7A1                                | 0.000           | 16             | 28.714    | 0.000           | 16             | 19.812    |
| ABCG5                                 | 0.000           | 14             | 38.620    | 0.000           | 18             | 25.003    |
