# Supplementary material for: Delayed first active-phase meal, a breakfast-skipping model, led to increased body weight and shifted the circadian oscillation of the hepatic clock and lipid metabolism-related genes in rats fed a high-fat diet
Source: PubMed Central journal article supplement (PMC6209334; doi:10.1371/journal.pone.0206669), 2018-10-31
Supplement: pone.0206669.s006.pdf [file pone.0206669.s006.pdf]

**Supplementary Table 6.** The JTK\_CYCLE analysis of circadian fluctuations in hepatic glucose metabolism related genes in DFAM rats (related to Fig 5).

| Hepatic glucose<br>metabolism related gene | Control         |                |           | DFAM            |                |           |
|--------------------------------------------|-----------------|----------------|-----------|-----------------|----------------|-----------|
|                                            | <i>p</i> -value | Peak time (ZT) | Amplitude | <i>p</i> -value | Peak time (ZT) | Amplitude |
| GCK                                        | 0.000           | 22             | 45.388    | 0.000           | 0              | 54.268    |
| PFKL                                       | 0.012           | 18             | 13.813    | 0.061           | 20             | 12.178    |
| LPK                                        | 0.061           | 2              | 7.416     | 0.054           | 6              | 12.695    |
| G6PC                                       | 0.037           | 2              | 31.531    | 0.000           | 6              | 41.945    |
| PEPCK                                      | 0.003           | 8              | 28.313    | 0.002           | 10             | 25.799    |
| TAT                                        | 0.002           | 16             | 27.469    | 0.943           | 18             | 6.548     |
