# Supplementary material for: Delayed first active-phase meal, a breakfast-skipping model, led to increased body weight and shifted the circadian oscillation of the hepatic clock and lipid metabolism-related genes in rats fed a high-fat diet
Source: PubMed Central journal article supplement (PMC6209334; doi:10.1371/journal.pone.0206669), 2018-10-31
Supplement: pone.0206669.s007.pdf [file pone.0206669.s007.pdf]

**Supplementary Table 7.** The results of two-way ANOVA of in serum parameters, hepatic genes expression in DFAM rats.

|                        | Two-way ANOVA   |             |             |
|------------------------|-----------------|-------------|-------------|
|                        | Time-effect     | DFAM-effect | Interaction |
| Serum glucose          | NS <sup>a</sup> | 0.05        | NS          |
| Serum cholesterol      | NS              | NS          | NS          |
| Serum triglyceride     | 0.05            | NS          | NS          |
| Serum NEFA             | 0.05            | NS          | 0.05        |
| Serum total bile acids | 0.05            | 0.05        | 0.05        |
| Serum insulin          | 0.05            | NS          | 0.05        |
| Serum corticosterone   | 0.05            | NS          | NS          |
| BMAL1                  | 0.05            | NS          | 0.05        |
| CLOCK                  | 0.05            | NS          | NS          |
| PER1                   | 0.05            | NS          | 0.05        |
| PER2                   | 0.05            | NS          | 0.05        |
| CRY1                   | 0.05            | NS          | 0.05        |
| CRY2                   | 0.05            | NS          | 0.05        |
| DEC1                   | 0.05            | NS          | 0.05        |
| DEC2                   | 0.05            | NS          | NS          |
| REV-ERB $\alpha$       | 0.05            | NS          | 0.05        |
| REV-ERB $\beta$        | 0.05            | NS          | 0.05        |
| ROR $\alpha$           | 0.05            | NS          | NS          |
| E4BP4                  | 0.05            | NS          | 0.05        |
| DBP                    | 0.05            | NS          | 0.05        |
| TEF                    | 0.05            | NS          | 0.05        |
| HLF                    | 0.05            | NS          | 0.05        |

|               |      |      |      |
|---------------|------|------|------|
| SREBP1c       | 0.05 | NS   | 0.05 |
| LXR $\alpha$  | 0.05 | 0.05 | NS   |
| ACLY          | 0.05 | NS   | 0.05 |
| FAS           | 0.05 | NS   | 0.05 |
| ME1           | 0.05 | NS   | NS   |
| PPAR $\alpha$ | 0.05 | NS   | NS   |
| CPT1 $\alpha$ | 0.05 | NS   | 0.05 |
| ACOX1         | 0.05 | NS   | NS   |
| HMG-CoAR      | 0.05 | NS   | NS   |
| HMG-CoAS      | 0.05 | NS   | 0.05 |
| CYP7A1        | 0.05 | NS   | 0.05 |
| ABCG5         | 0.05 | NS   | 0.05 |
| GCK           | 0.05 | NS   | NS   |
| PFKL          | 0.05 | 0.05 | NS   |
| LPK           | 0.05 | NS   | NS   |
| G6PC          | 0.05 | NS   | NS   |
| PEPCK         | 0.05 | NS   | NS   |
| TAT           | 0.05 | NS   | NS   |

---

<sup>a</sup> NS, not significant ( $p>0.05$ ); 0.05, significant ( $p<0.05$ )
