# Supplementary material for: Delayed first active-phase meal, a breakfast-skipping model, led to increased body weight and shifted the circadian oscillation of the hepatic clock and lipid metabolism-related genes in rats fed a high-fat diet
Source: PubMed Central journal article supplement (PMC6209334; doi:10.1371/journal.pone.0206669), 2018-10-31
Supplement: pone.0206669.s008.pdf [file pone.0206669.s008.pdf]

**Supplementary Table 8.** The JTK\_CYCLE analysis of circadian fluctuations in epididymal adipose tissue of DFAM rats (Related to S2 Fig)

| Genes | Control         |                |           | DFAM            |                |           |
|-------|-----------------|----------------|-----------|-----------------|----------------|-----------|
|       | <i>p</i> -value | Peak Time (ZT) | Amplitude | <i>p</i> -value | Peak Time (ZT) | Amplitude |
| BMAL1 | 0.000           | 0              | 38.640    | 0.000           | 0              | 85.835    |
| CLOCK | 0.006           | 20             | 28.602    | 0.054           | 0              | 19.436    |
| PER1  | 0.000           | 12             | 250.198   | 0.000           | 16             | 138.295   |
| PER2  | 0.000           | 14             | 95.984    | 0.000           | 18             | 119.529   |
| CRY1  | 0.000           | 20             | 47.102    | 0.000           | 22             | 35.945    |
| CRY2  | 1.000           | 18             | 14.383    | 1.000           | 10             | 25.548    |
