# Supplementary material for: Delayed first active-phase meal, a breakfast-skipping model, led to increased body weight and shifted the circadian oscillation of the hepatic clock and lipid metabolism-related genes in rats fed a high-fat diet
Source: PubMed Central journal article supplement (PMC6209334; doi:10.1371/journal.pone.0206669), 2018-10-31
Supplement: pone.0206669.s009.pdf [file pone.0206669.s009.pdf]

**Supplementary Table 9.** The results of two-way ANOVA of gene expressions in epididymal adipose tissue of DFAM rats (Related to S2 Fig).

|       | Two-way ANOVA |                 |             |
|-------|---------------|-----------------|-------------|
|       | Time-effect   | DFAM-effect     | Interaction |
| BMAL1 | 0.05          | NS <sup>a</sup> | 0.05        |
| CLOCK | NS            | 0.05            | NS          |
| PER1  | 0.05          | NS              | NS          |
| PER2  | 0.05          | NS              | 0.05        |
| CRY1  | 0.05          | NS              | NS          |
| CRY2  | NS            | NS              | NS          |

<sup>a</sup> NS, not significant ( $p>0.05$ ); 0.05, significant ( $p<0.05$ );
