# Supplementary material for: Delayed first active-phase meal, a breakfast-skipping model, led to increased body weight and shifted the circadian oscillation of the hepatic clock and lipid metabolism-related genes in rats fed a high-fat diet
Source: PubMed Central journal article supplement (PMC6209334; doi:10.1371/journal.pone.0206669), 2018-10-31
Supplement: pone.0206669.s010.pdf [file pone.0206669.s010.pdf]

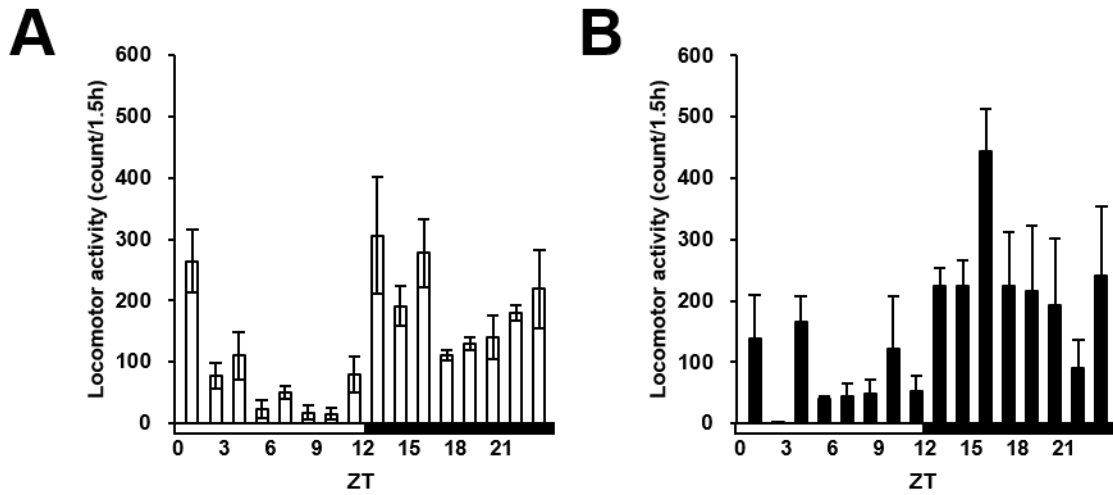

**Supplementary Figure 1. DFAM did not change locomotor activity in rats fed a high-cholesterol diet.** In another DFAM experiment, we monitored the locomotor activity for 24 hours. These data are the reference for the present study. Control rats were allowed access to a diet from ZT 12–24. The DFAM group was allowed access to a diet from ZT 16–4. Total activity was not different between both groups. The patterns of locomotor activity in (A) control and (B) DFAM group during a day were similar. Values showed mean  $\pm$  SEM of 3 rats. The open and closed horizontal bars indicate the light (ZT 0-12) and the dark (ZT 12-24).
